# Supplementary material
Source: Springer Nature journal article supplement (https://www.springermedizin.de/resource/supplementary/13051_2011_221_MOESM2_ESM.pdf/9670194)

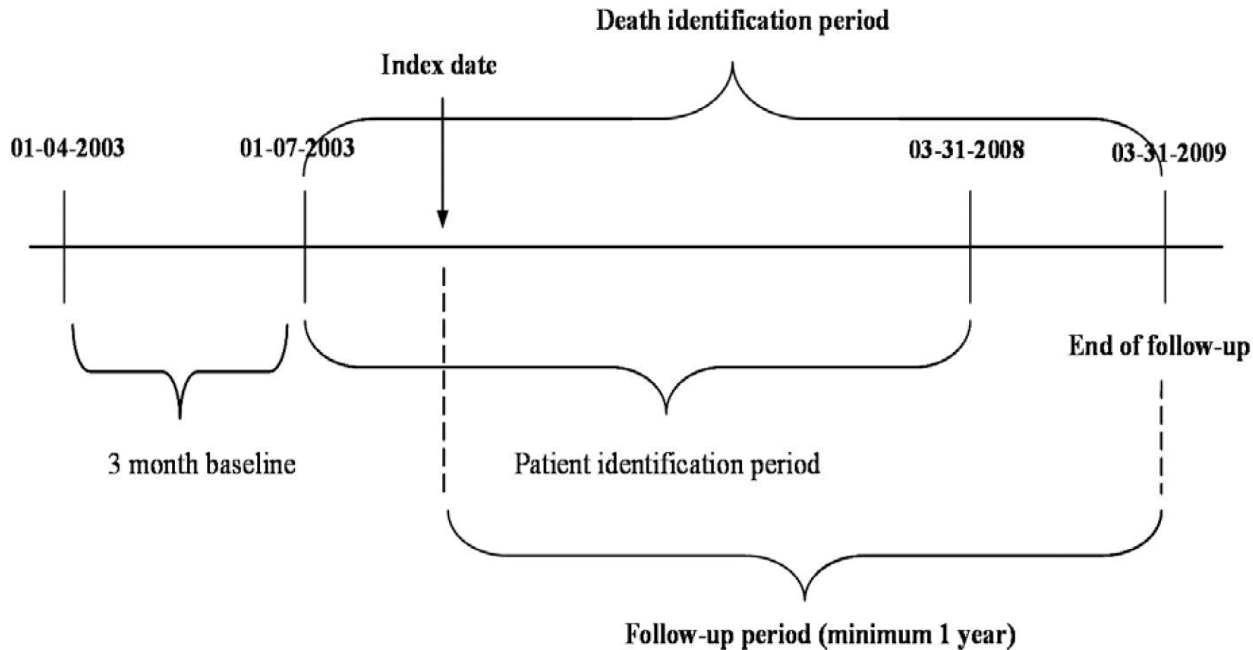

Supplement: MOESM2 [file 9670194]
